# Supplementary material
Source: publisher site journal article supplement (https://www.dovepress.com/article/496579)

**Supplementary material**

**Risk of subclinical hypothyroidism in breast cancer patients treated with CT-guided radiation therapy**

Lau Amdisen1, Carsten Brink2,3, Ebbe Laugaard Lorenzen2,3, Jeanette Dupont Roenlev4, Marianne Ewertz2, Deirdre Cronin-Fenton1

1Department of Clinical Epidemiology, Department of Clinical Medicine, Aarhus University and Aarhus University Hospital, Aarhus, Denmark

2Department of Clinical Research, University of Southern Denmark, Odense, Denmark

3Laboratory of Radiation Physics, Department of Oncology, Odense University Hospital, Odense, Denmark

4Department of Oncology, Odense University Hospital, Odense, Denmark

*Corresponding author*

Lau Amdisen

amdisen@clin.au.dk

+45 8716 8229

Department of Clinical Epidemiology

Aarhus University and Aarhus University Hospital

Olof Palmes Allé 43-45, 8200 Aarhus N, Denmark

**Supplementary Figure 1.** Flowchart of selection of the study population

Invited (*i*) patients who received adjuvant chemotherapy with lymph node negative disease, who received breast irradiation, but not lymph node irradiation and (*ii*) patients with lymph node positive disease, who were assigned to breast and lymph node irradiation

Patients with a history of thyroid disease, benign or malignant breast disease, or cancer who received radiation therapy at any anatomic site above the waist

Patients recruited for the study

n = 156

Patients without information on mean radiation dose to the thyroid

n = 28

Patient with an abnormally large thyroid

n = 1

Patients with no baseline visit

n = 3

Patients with no visits after end of radiation therapy

n = 7

Patients receiving chemotherapy, but with no blood sample between end of chemotherapy and start of radiation therapy

n = 12

Patients eligible for inclusion in the study

n = 105

Patients included in the secondary analysis

n = 76

Patients with TSH >2.5mIU/l at baseline visit

n = 29

Patients included in the main analysis

n = 102

Patients with elevated TSH (>4 mU/l) at baseline visit

n = 3

**Supplementary Figure 2.** Plot of the log-likelihood of all the models that were evaluated during the best subset selection process. The red dotted line indicates the upper range of the one standard error of the best-performing model. Even the simplest model (the null model without any predictors included) performed within the one-standard-error rule as well as the best-performing model.


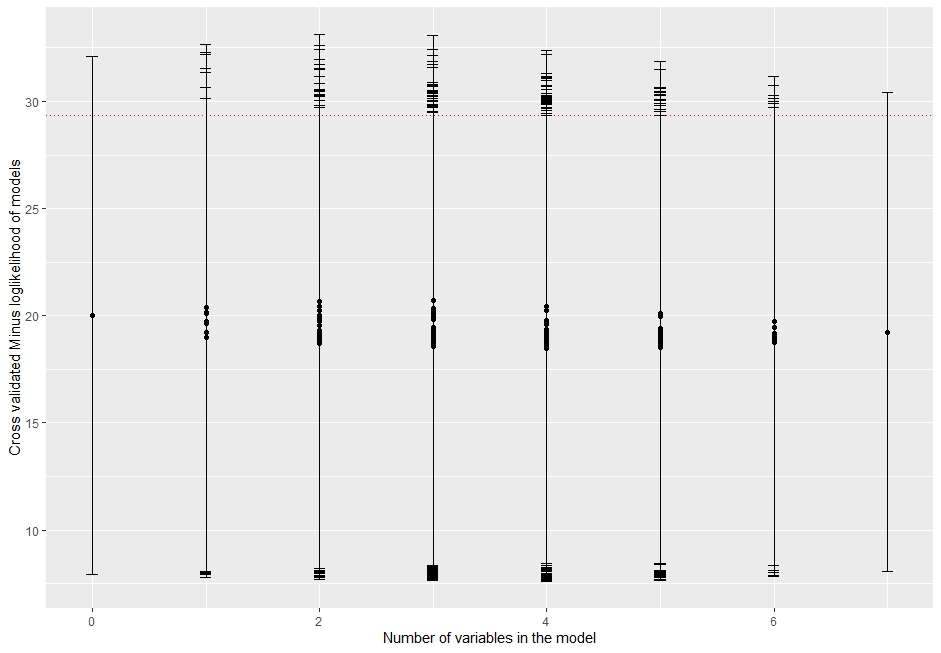

Supplement: Supplementary file 1 [file get_supplementary_file.php]
